# Supplementary material for: Kinetics and mechanisms of flumequine degradation by sulfate radical based AOP in different water samples containing inorganic anions
Source: Royal Society of Chemistry journal article supplement (doi:10.1039/d2ra00199c), 2022-01-01

## Supplementary Data

### **Kinetics and mechanisms of flumequine degradation by sulfate radical based AOP in different water samples containing inorganic anions**

Yuanyuan Zhang <sup>1,2</sup>, Kunling Huang <sup>1</sup>, Yunjie Zhu <sup>1</sup>, Xuan Chen <sup>1</sup>, Min Wei <sup>1</sup>, Kefu Yu <sup>1\*,2</sup>

<sup>a</sup> School of Marine Sciences, Guangxi Laboratory on the Study of Coral Reefs in the South China Sea, Guangxi University, Nanning 530004, China

<sup>b</sup> Southern Marine Science and Engineering Guangdong Laboratory (Zhuhai), Zhuhai 519000, China

### **List of Supporting Figures**

**Figure. S1.** LC/MS-ESI<sup>+</sup> spectra for FLU.

**Figure. S2.** LC/MS-ESI<sup>+</sup> spectra for intermediate product (P234) of the reaction between FLU.

**Figure. S3.** LC/MS-ESI<sup>+</sup> spectra for intermediate products (P220-1 and P220-2) of the reaction between FLU and UV/PDS.

**Figure. S4.** LC/MS-ESI<sup>+</sup> spectra for final product of the reaction between FLU and UV/PDS.

Figure. S1.

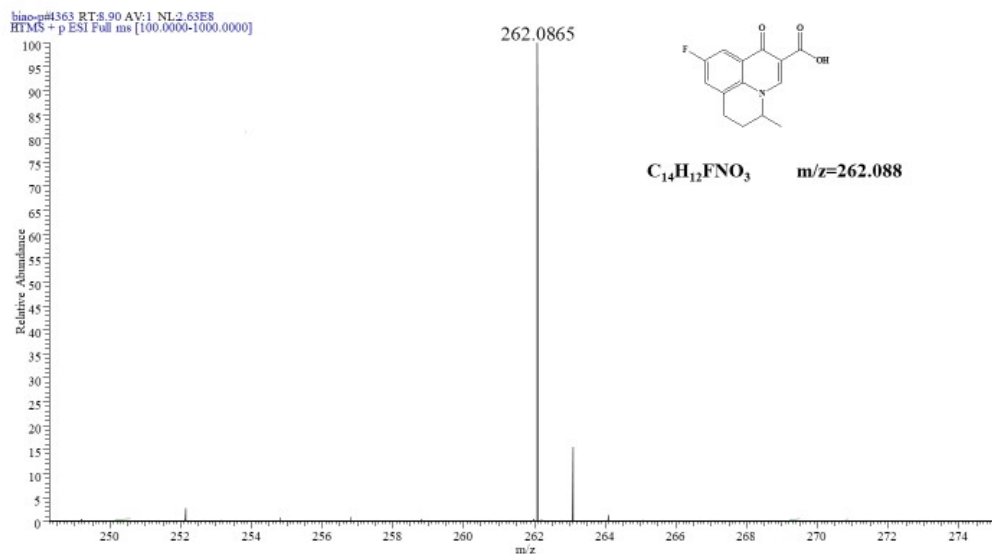

Figure. S2.

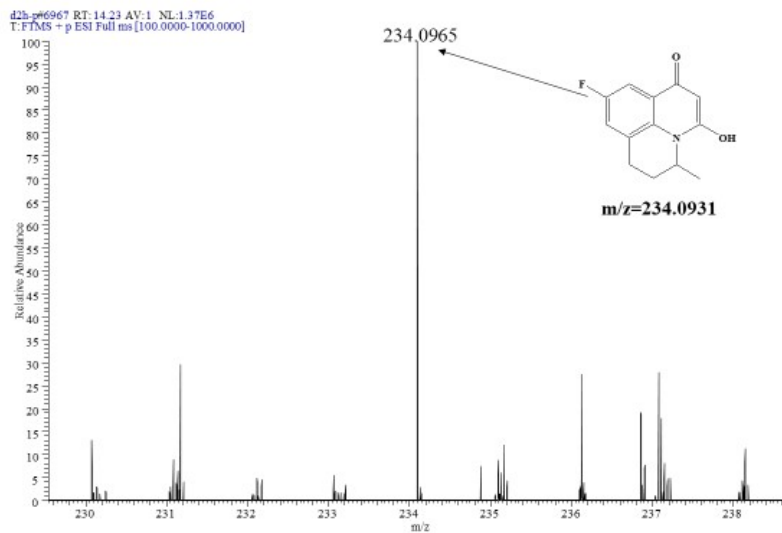

Figure. S3.

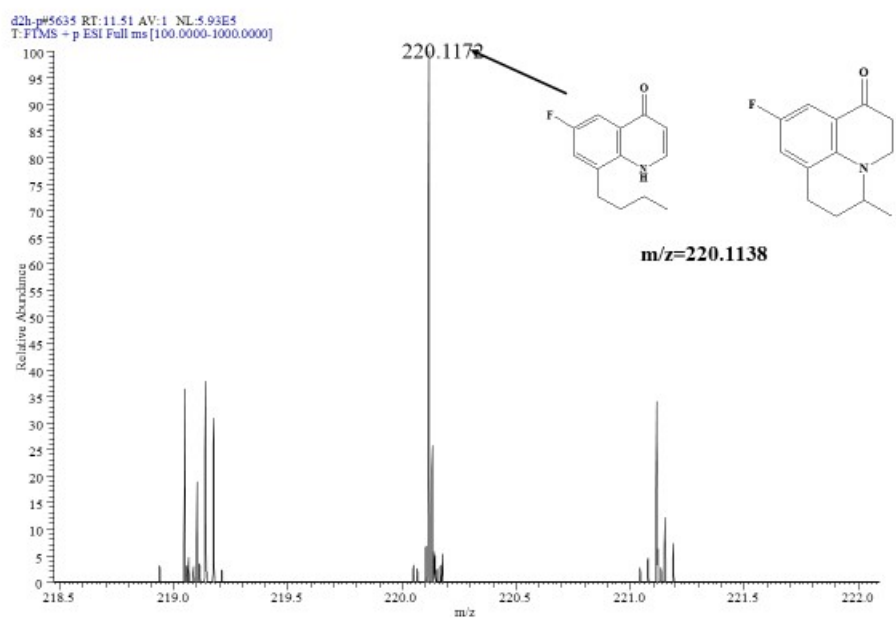

**Figure. S4.**

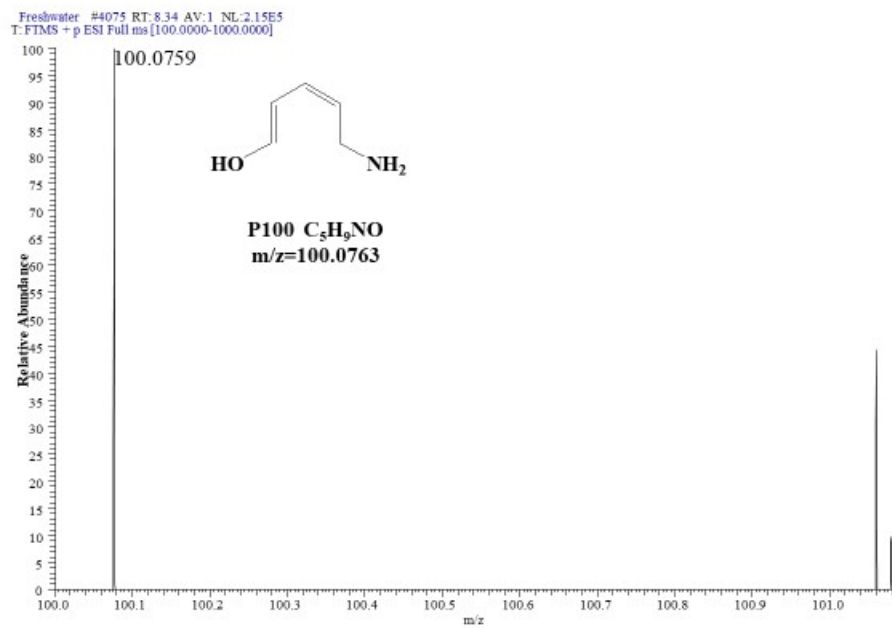

Supplement: d2ra00199c1.pdf [file d2ra00199c1.pdf]
